# Supplementary material for: Aberrant expression of thyroidal hormone receptor α exasperating mitochondrial dysfunction induced sarcopenia in aged mice
Source: publisher site journal article supplement (doi:10.18632/aging.205748), 2024-04-18
Supplement: Supplementary file [file aging-v16i8-205748-supplementary-material-SD1.pdf]

**SUPPLEMENTARY TABLE**

**Supplementary Table 1. Sequences of primers used.**

| <b>mRNAs</b>         |         | <b>Primer sequence (5'-3')</b> |
|----------------------|---------|--------------------------------|
| TR $\alpha$          | Forward | GGTCACCAGATGGAAAGCGAA          |
|                      | Reverse | CCTTGTCACACACACGA              |
| Myf5                 | Forward | CCTGTCTGGTCCCGAAAGAAC          |
|                      | Reverse | GACGTGATCCGATCCACAATG          |
| MyoD1                | Forward | CCACTCCGGGACATAGACTTG          |
|                      | Reverse | AAAAGCGCAGGTCTGGTGAG           |
| MyoG                 | Forward | GAGACATCCCCCTATTTCTACCA        |
|                      | Reverse | GCTCAGTCCGCTCATAGCC            |
| MuRF1                | Forward | GACAGTCGATTTCAAAGCA            |
|                      | Reverse | AACGACCTCCAGACATGGAC           |
| Atrogin-1            | Forward | CTCTGTACCATGCCGTTCTT           |
|                      | Reverse | GGCTGCTGAACAGATTCTCC           |
| p16 <sup>ink4a</sup> | Forward | GCTCAACTACGGTGCAGATTC          |
|                      | Reverse | GCACGATGTCTTGATGTCCC           |
| p21                  | Forward | CGAGAACGGTGGAACTTTGAC          |
|                      | Reverse | CCAGGGCTCAGGTAGACCTT           |
| PGC-1 $\alpha$       | Forward | AAGTGGTGTAGCGACCAATCG          |
|                      | Reverse | AATGAGGGCAATCCGTCTTCA          |
| Tfam                 | Forward | GAGCGTGCTAAAAGCACTGG           |
|                      | Reverse | CCACAGGGCTGCAATTTTCC           |
| Nrf-1                | Forward | GGTGGGGGACAGATAGTCCT           |
|                      | Reverse | GCTGTCCGATATCCTGGTGG           |
| Nrf-2                | Forward | CGCTGGAAAAGAAGTGGGC            |
|                      | Reverse | AGTGAAGTACTGATGGCAGC           |
| Mfn1                 | Forward | TGCCCTCTGAGAGATGACC            |
|                      | Reverse | AGAGCCGCTCATTACCTTA            |
| Mfn2                 | Forward | AGAAGTGGACCCGGTTACCA           |
|                      | Reverse | CACTTCGCTGATACCCCTGA           |
| Opa1                 | Forward | TCAGCAAAGCTTACATGCAGA          |
|                      | Reverse | TGCTTGACTGGCTACATTTT           |
| Drp1                 | Forward | ACTGATTCAATCCGTGATGAGT         |
|                      | Reverse | GTAACCTATTCCAGGGTCCTAGC        |
| Pink1                | Forward | CTCAAGTCCGACAACATCCT           |
|                      | Reverse | GCCATTGCCACCACGCTCTA           |
| DJ-1                 | Forward | AGCCGGGATCAAAGTCACTG           |
|                      | Reverse | GGTCCCTGCGTTTTTGCATC           |
| LC3II                | Forward | AGCAGCATCCAACCAAAATC           |
|                      | Reverse | CTGTGTCCGTTACCAACAG            |
| p62                  | Forward | GTGAATTCGCTCGCCGCTCGCTAT       |
|                      | Reverse | CGTCTCGAGTGCCTGCTGACAACACCTA   |
| $\beta$ -actin       | Forward | GACAACCTTTGGCATCGTGGA          |
|                      | Reverse | ATGCAGGGATGATGTTCTGG           |
